# Supplementary figures and images for: Functional Dynamics of the Gut Microbiome in Elderly People during Probiotic Consumption
Source: PubMed Central journal article supplement — mBio. 2015 Apr 14;6(2):e00231-15. doi: 10.1128/mBio.00231-15 (PMC4453556; doi:10.1128/mbio.00231-15), 2015-04-14

**A**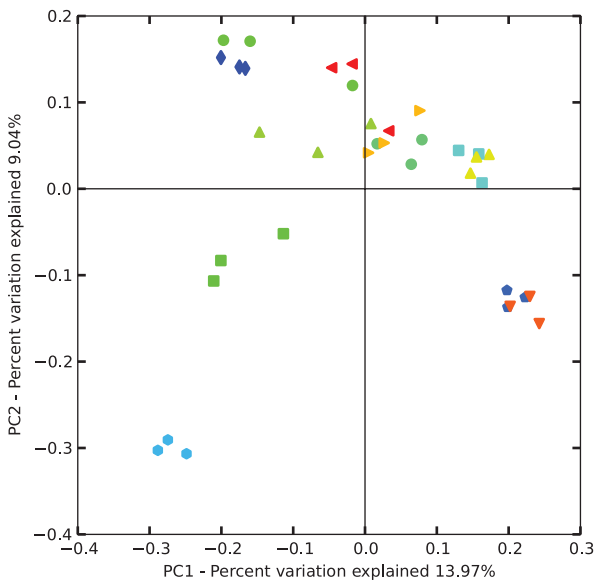**B**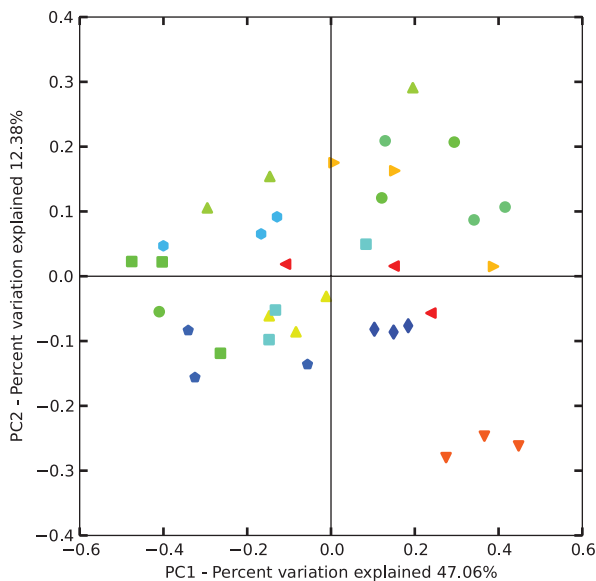

Supplement: mbo002152245sf1.pdf [file mbo002152245sf1.pdf]

FigS2D

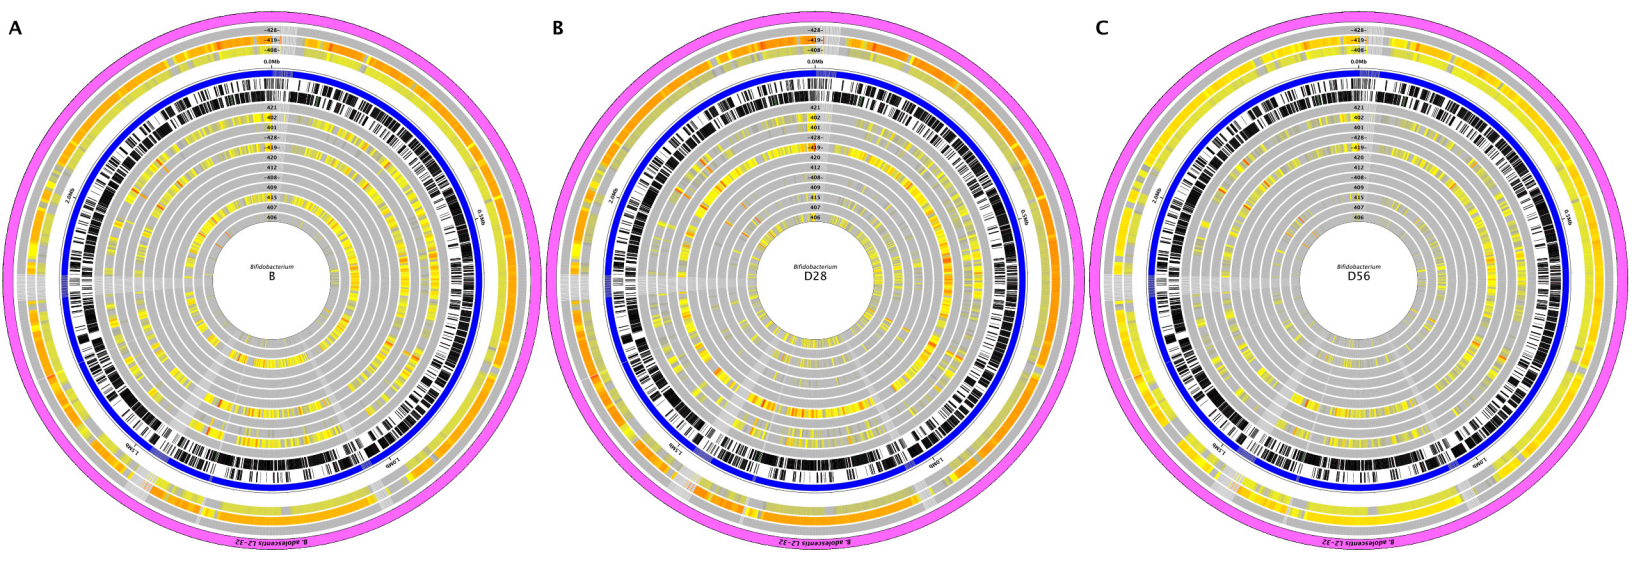

FigS2E

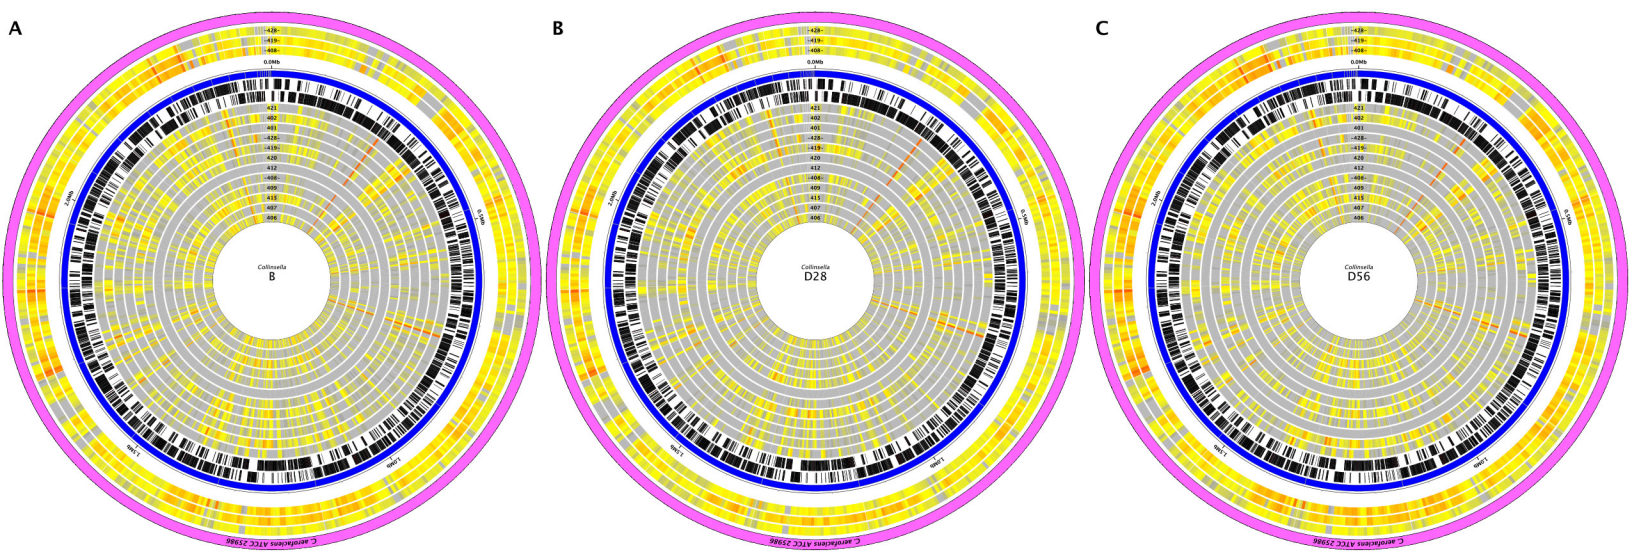

FigS2F

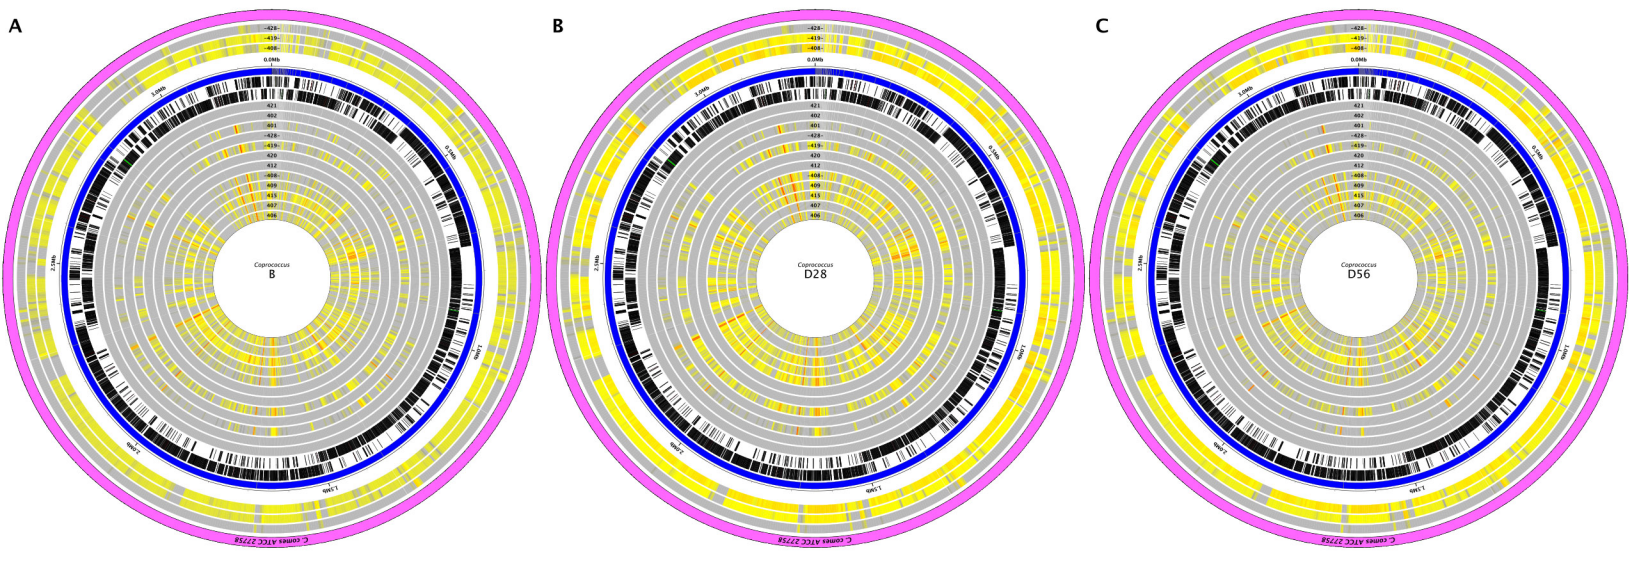

FigS2G

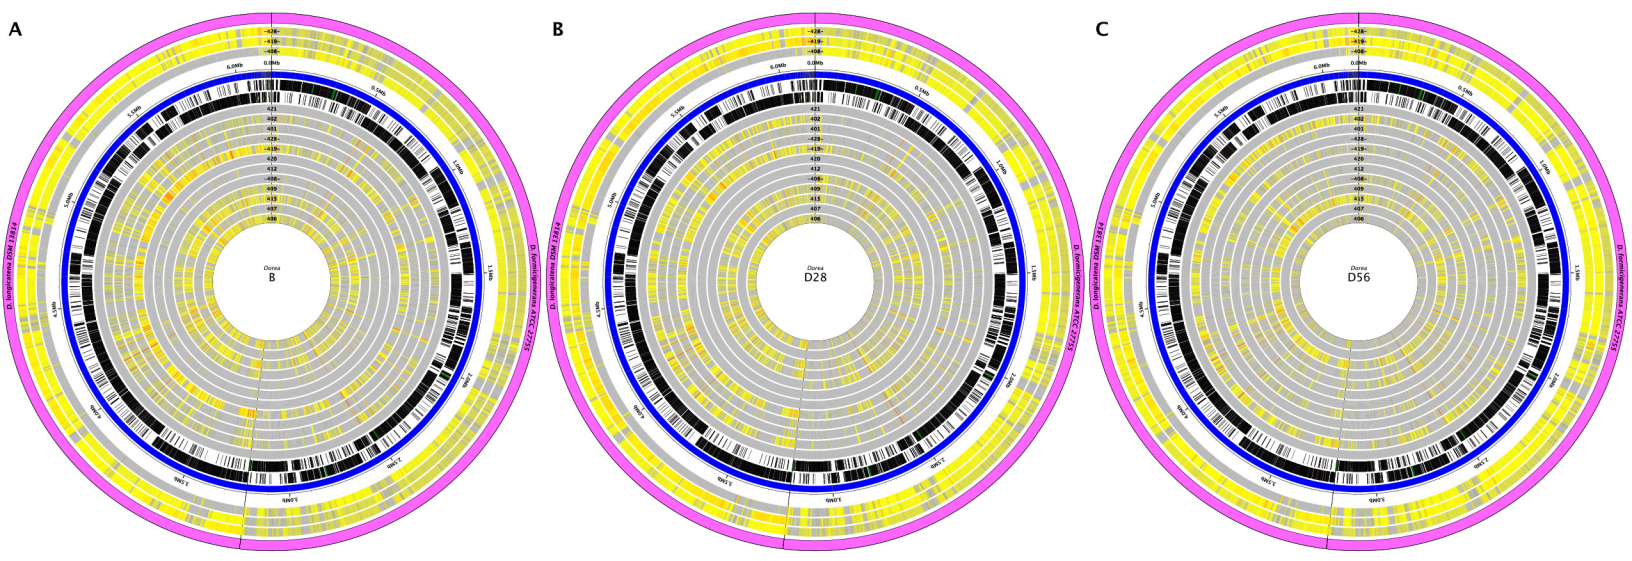

FigS2H

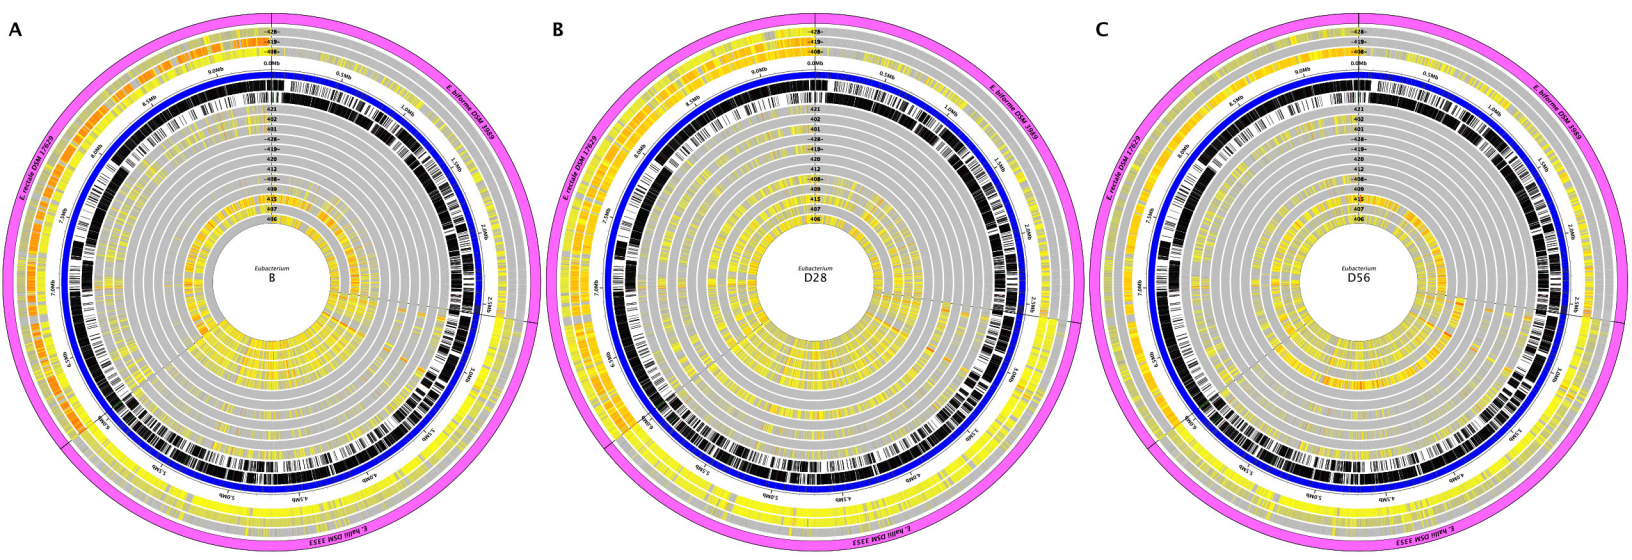

FigS2I

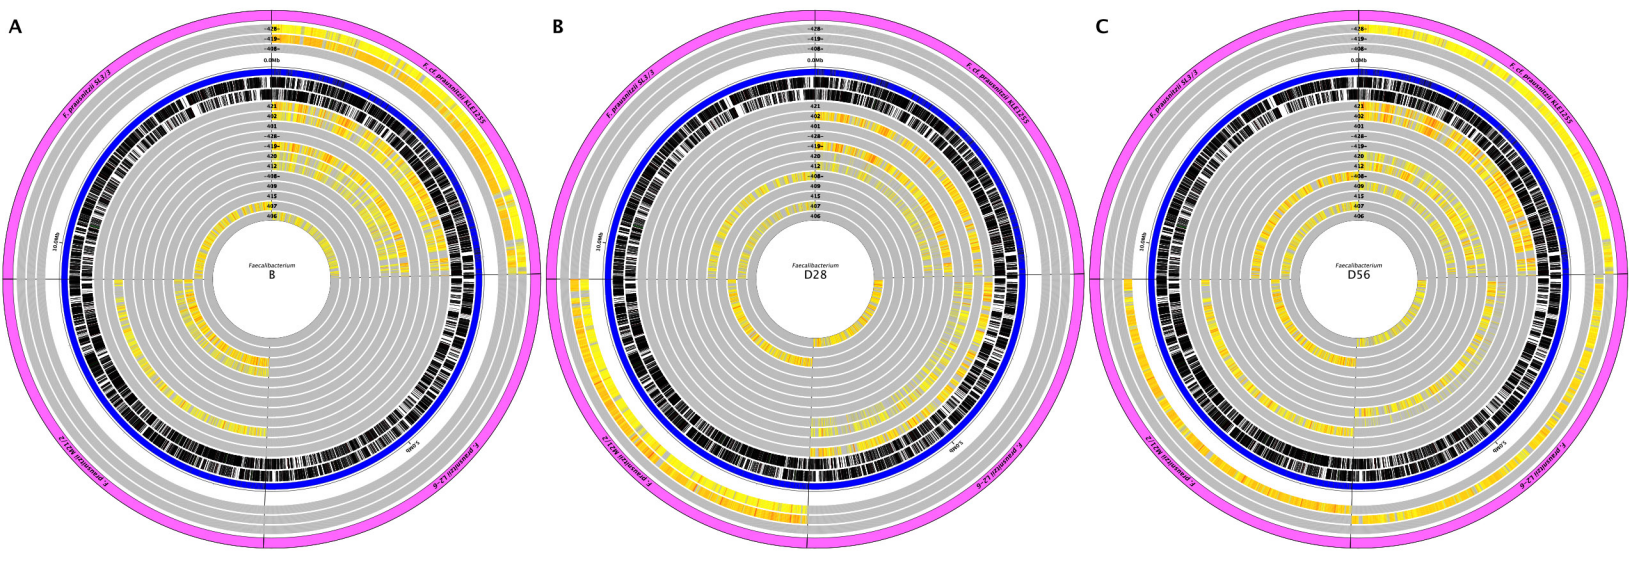

FigS2J

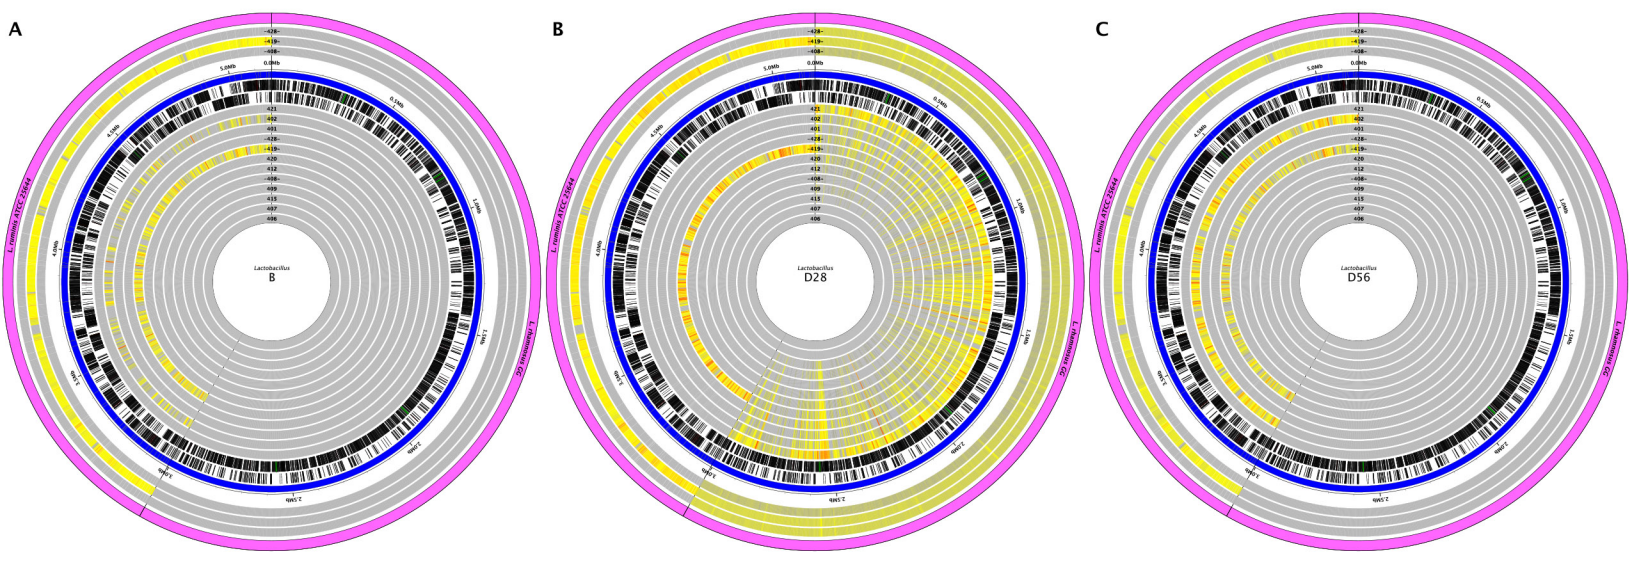

FigS2K

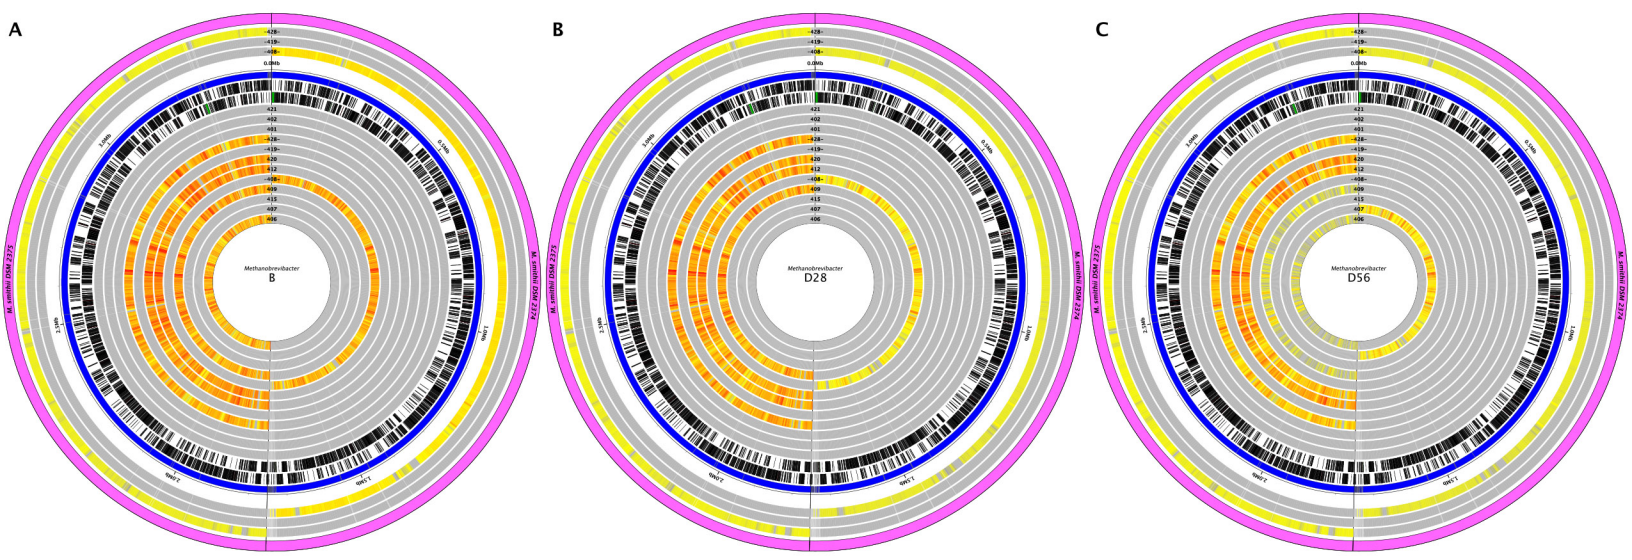

FigS2L

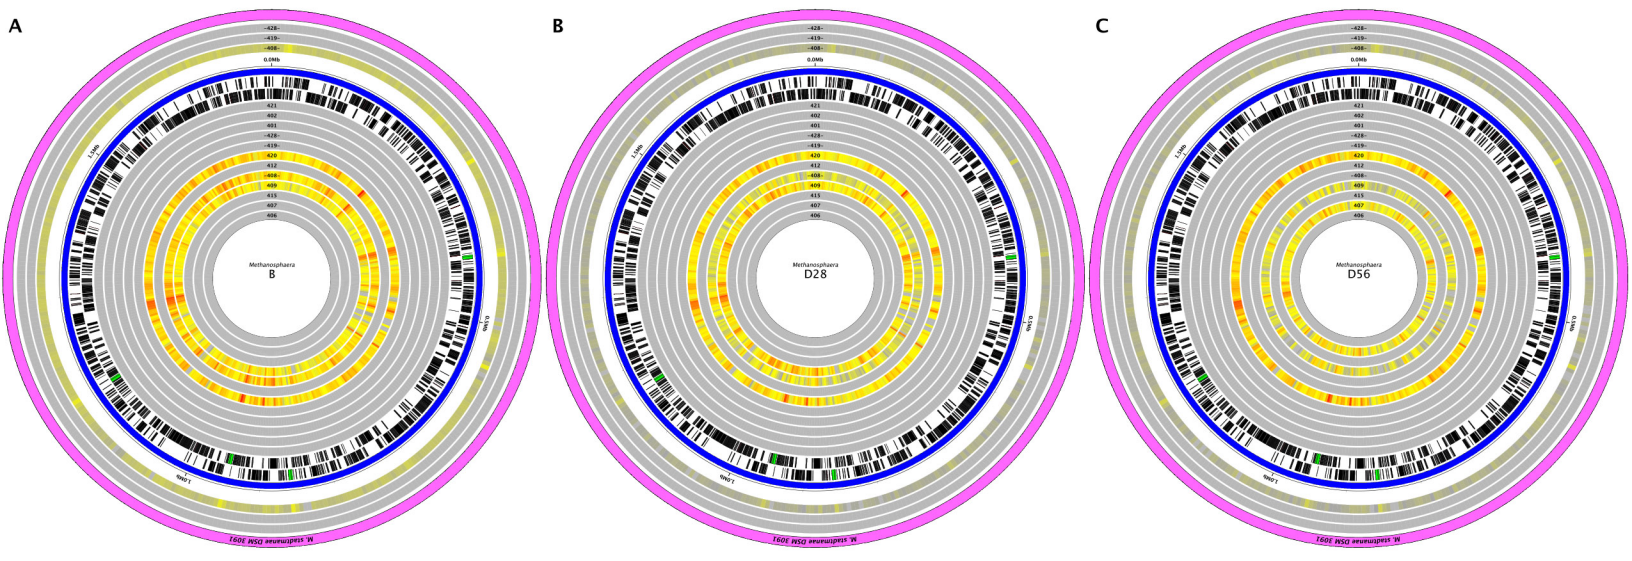

**FigS2M**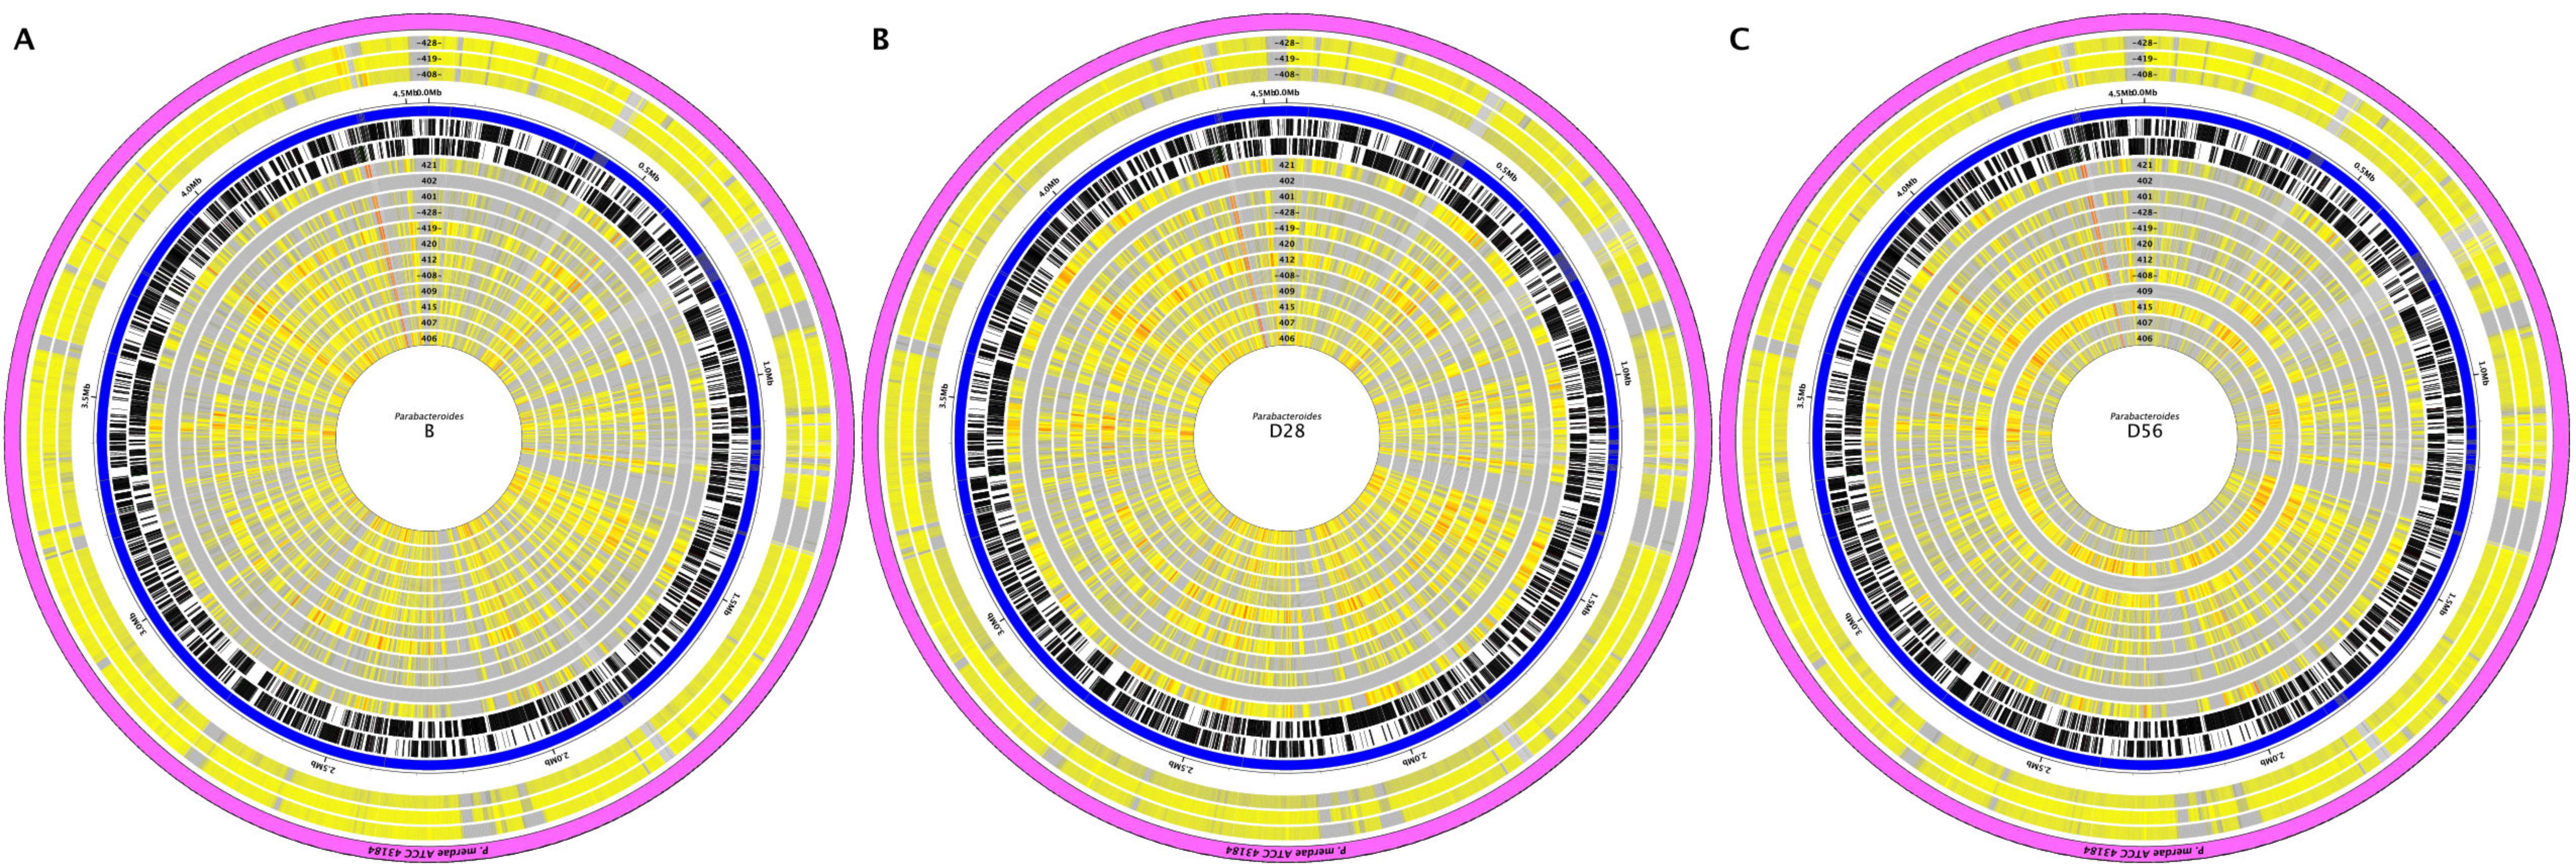**FigS2N**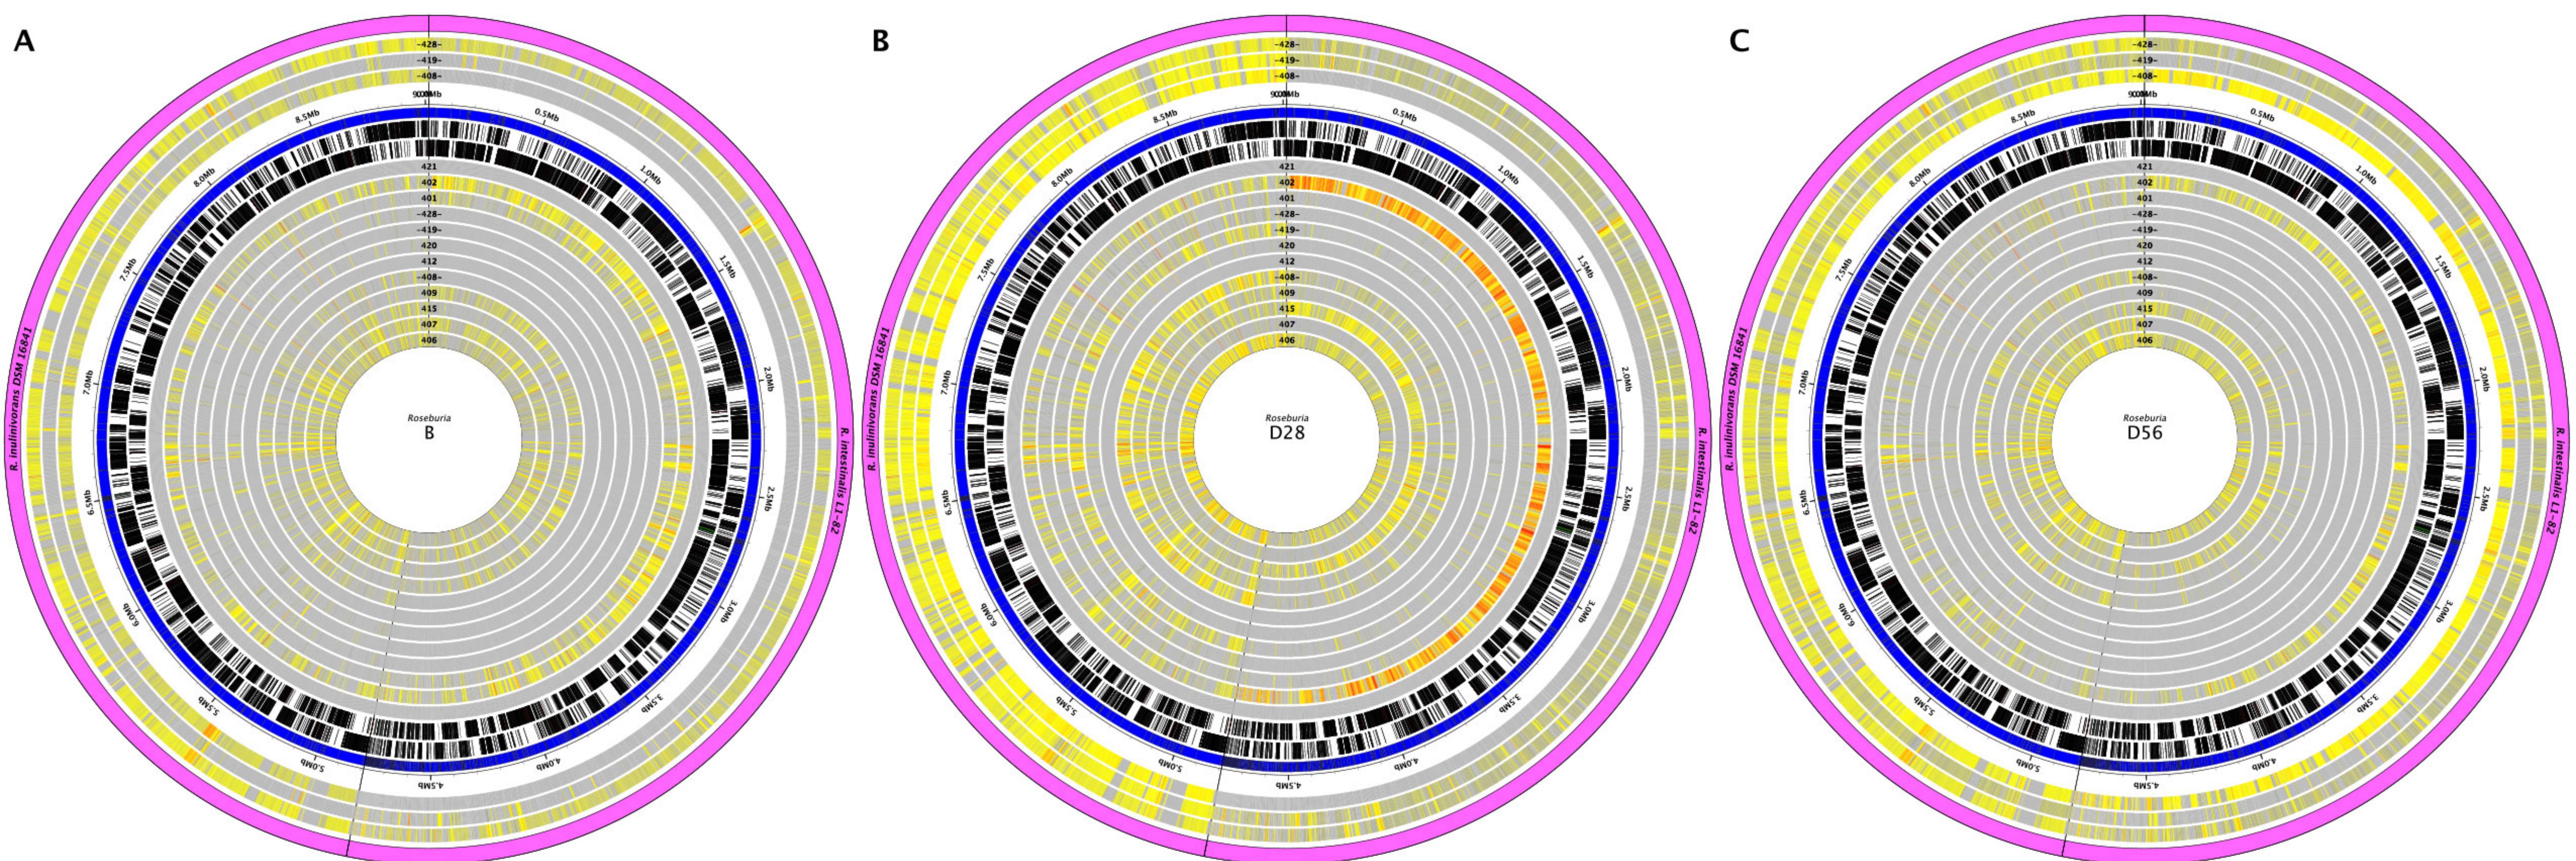**FigS2O**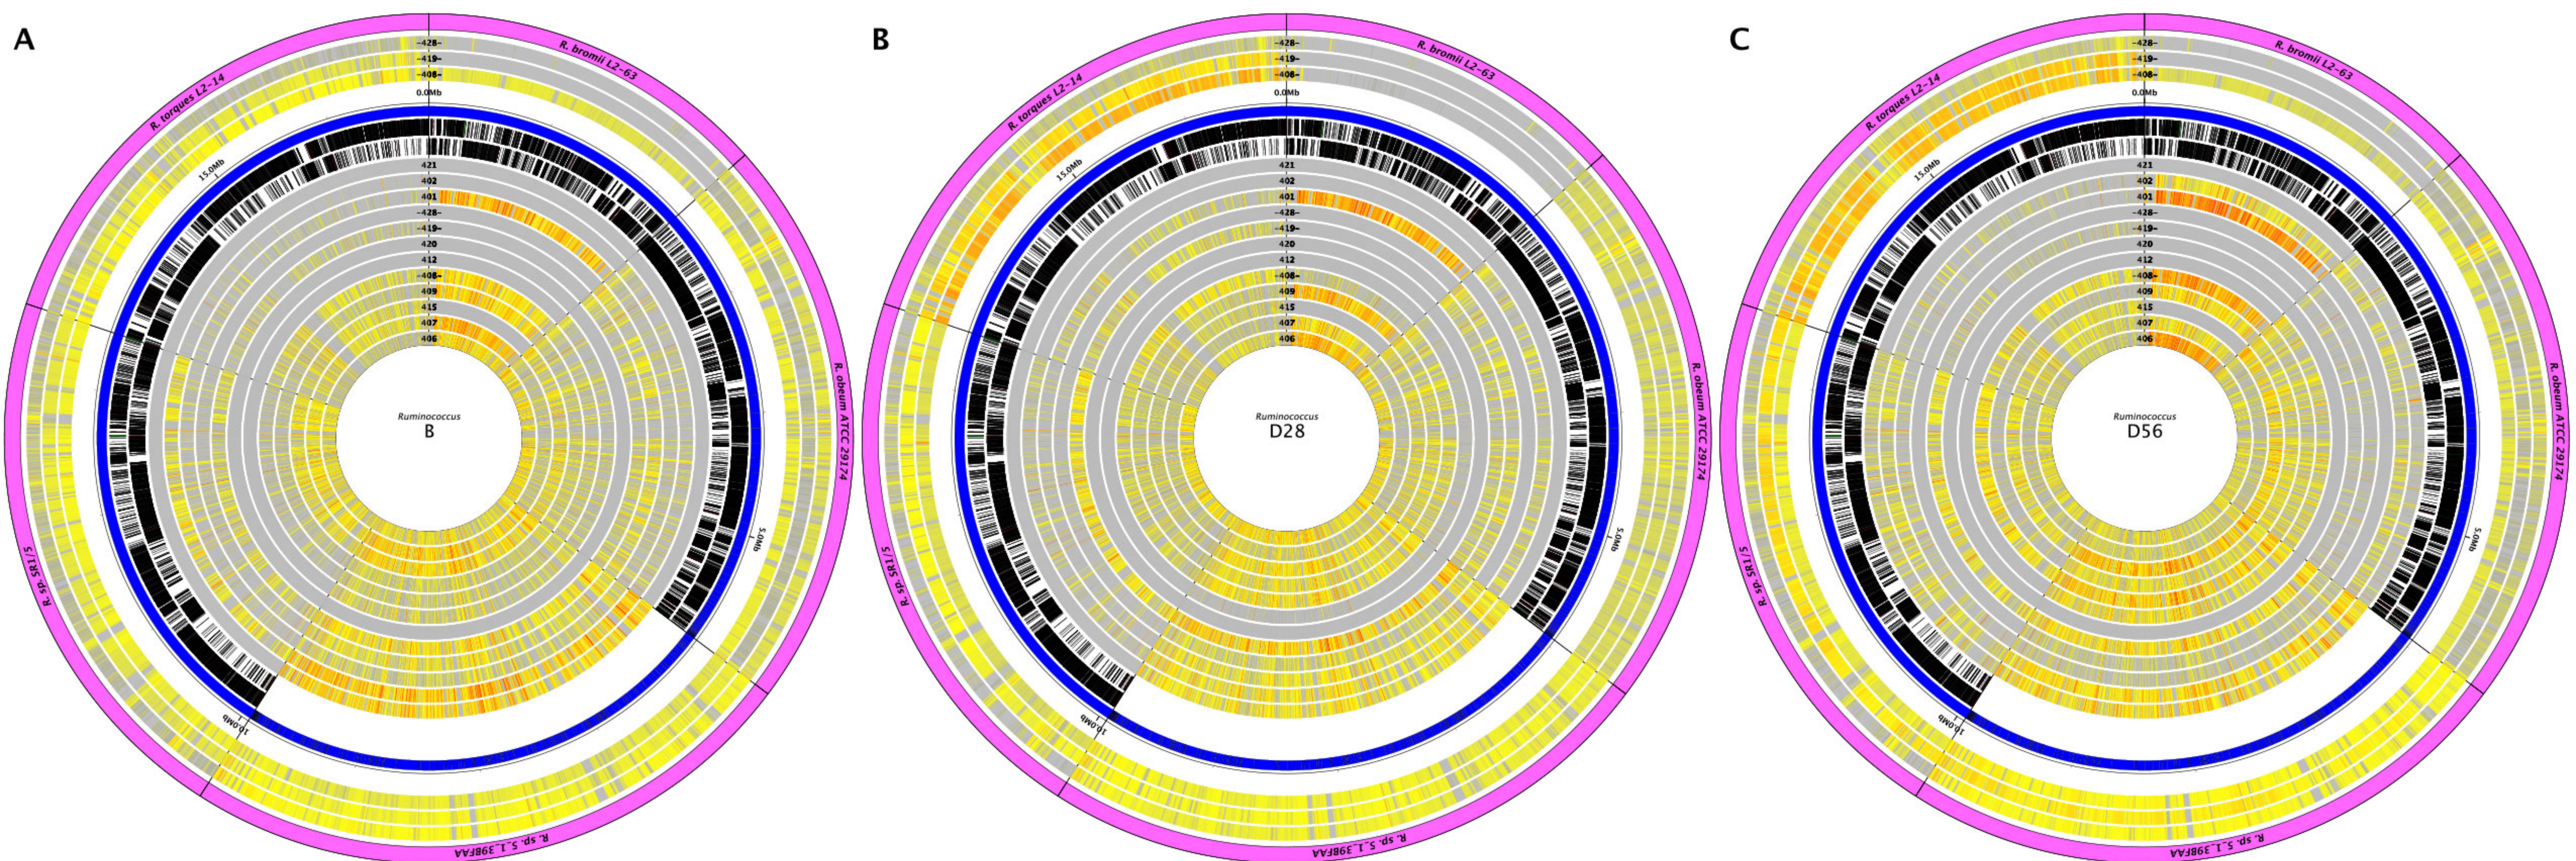

FigS2P

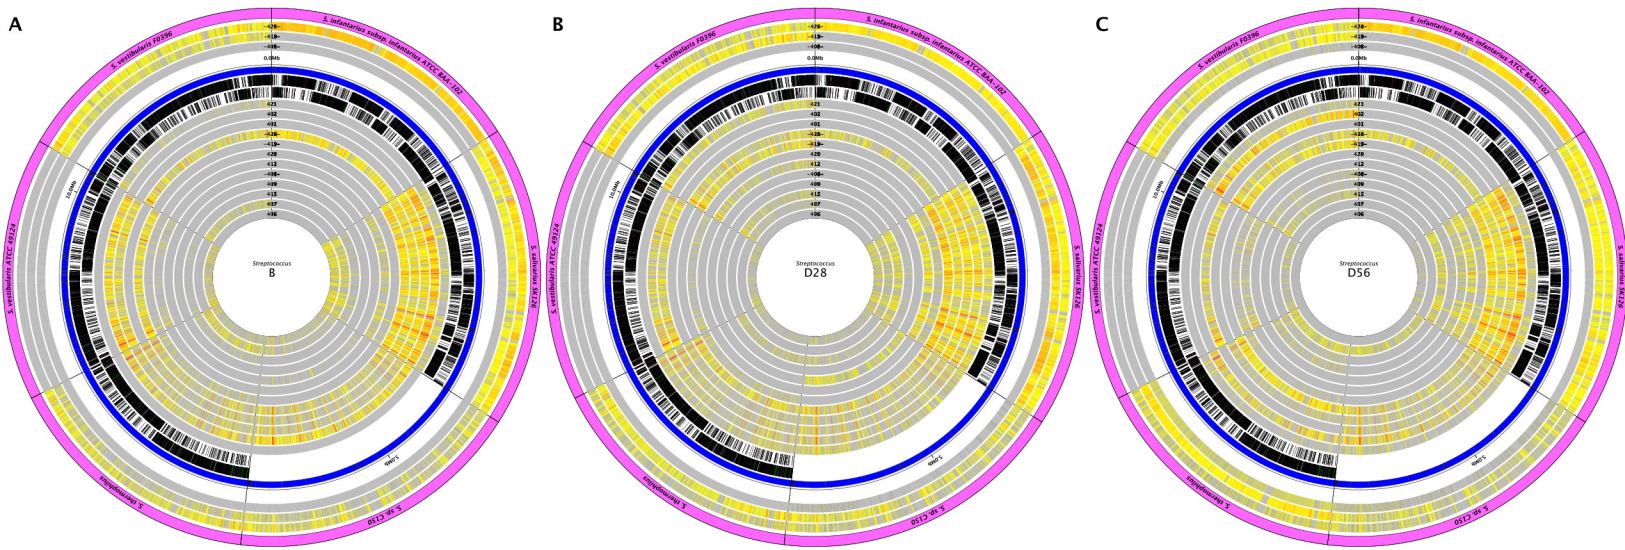

Supplement: mbo002152245sf2.pdf [file mbo002152245sf2.pdf]

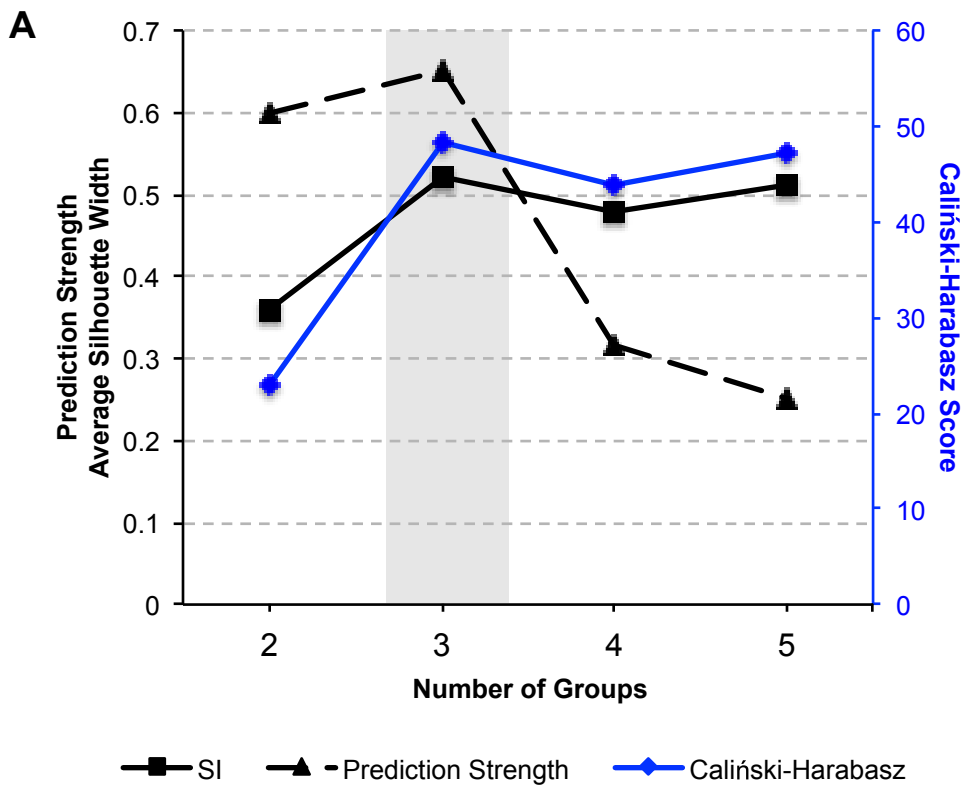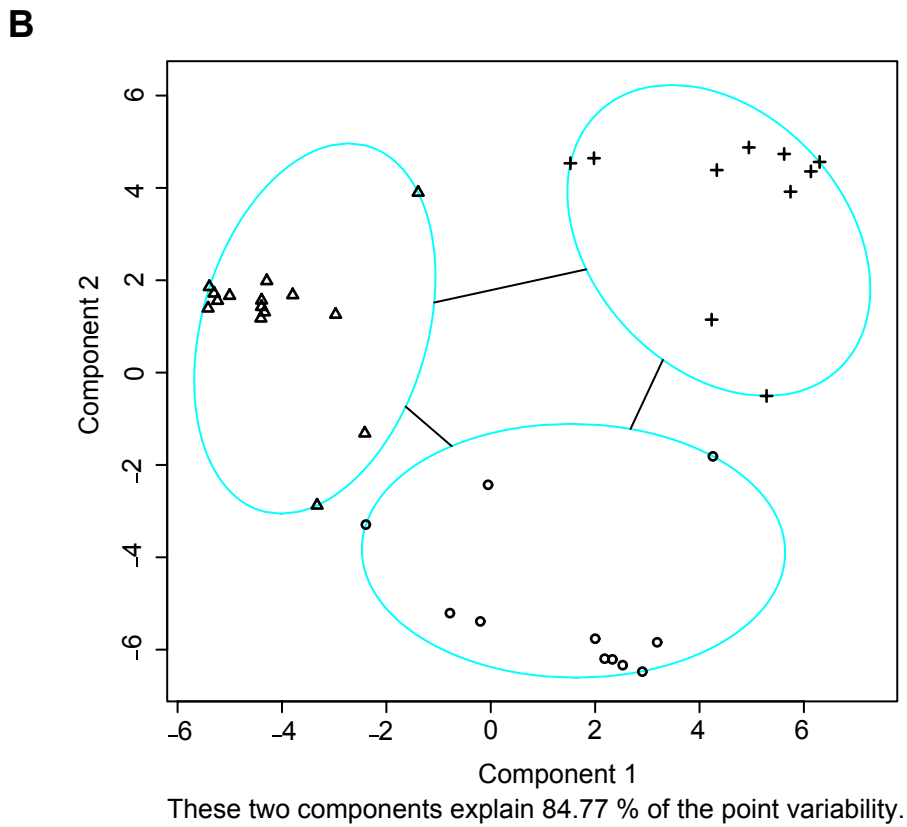

Supplement: mbo002152245sf3.pdf [file mbo002152245sf3.pdf]
